# Supplementary material for: Genes and Genetic Testing in Hereditary Ataxias
Source: Genes (Basel). 2014 Jul 22;5(3):586–603. doi: 10.3390/genes5030586 (PMC4198919; doi:10.3390/genes5030586)
Supplement: Supplementary File 1 [file genes-05-00586-s001.xlsx]

## Sheet: Table S1
Table S1 - Dominant
Ataxia	Aliases	Physical Location (Hg19)	Locus	Gene	Protein	Mutation Type	Normal Repeat Length	Disease Repeat Length	Age of Onset	Anticipation	Population	Pathway
SCA1		6:16,299,342 - 16,761,720	6p22	ATXN1	Ataxin1	CAG repeat	≤ 35 repeats	>41 repeats	early childhood to late adult	Yes	Worldwide
SCA2		12:111,890,017 - 112,037,479	12q24	ATXN2	Ataxin2	CAG repeat	≤ 31 repeats	>33 repeats	early childhood to late adult	Yes	Worldwide
SCA3	Machado-Joseph	14:92,524,895 - 92,572,964	14q32	ATXN3	Ataxin3	CAG repeat	≤ 40 repeats	>51 repeats	early childhood to late adult	Yes	Worldwide	Ubiquitination
SCA5		11:66449966-66496715	11q13	SPTBN2	Spectrin Neta Nonerythrocytic 2	Deletion, Missense			early childhood to late adult	Yes	American, French, German
SCA6		19:13,317,255 - 13,617,273	19p13	CACNA1A	CACNA1A	CAG repeat	≤ 18 repeats	>20 repeats	mid to late adult	Yes	Worldwide	Channelopathy
SCA7		3:63,849,784 - 63,989,239	3p14	ATXN7	Ataxin7	CAG repeat	≤ 18 repeats	>37 repeats	early childhood to late adult	Yes	Worldwide
SCA8		13:70,681,344 - 70,713,884	13q21	ATXN8OS	Ataxin 8 Opposite Strand	CTG repeat	≤ 50 repeats	>80 repeats	early childhood to late adult	Yes	Worldwide
SCA10		22:46,067,677 - 46,241,186	22q13	ATXN10	Ataxin 10	ATTCT repeat	≤ 22 repeats	>280 repeats	childhood to adult	Yes	Mexican, Brazilian
SCA11		15:43,030,927 - 43,213,036	15q15	TTBK2	Tau Tubulin Kinase 2	Frameshift			adult	None reported	English, Pakistani
SCA12		5:145,969,066 - 146,461,082	5q32	PPP2R2B	Protein Phosphatase 2, Regulatory Subunit B	CAG repeat	≤ 32 repeats	>55 repeats	childhood to adult	Yes	German, Indian
SCA13		19:50,818,764 - 50,832,633	19q13	KCNC3	Potassium Channel Voltage Gated Shaw Related Subfamily Member 3	Missense			early childhood	None reported	French, Filipino	Channelopathy
SCA14		19:54,385,466 - 54,410,905	19q13	PRKCG	Protein Kinase C, Gamma	Missense			adult	None reported	Worldwide
SCA15/16		3:4,535,031 - 4,889,523	3p26	ITPR1	Inositol 1,4,5-Triphosphate receptor type 1	Deletion, Missense			childhood to adult	None reported	Japanese, French	Channelopathy
SCA17		6:170,863,383 - 170,881,957	6q27	TBP	TATA Box-Binding Protein	CAG repeat	≤ 42 repeats	>43 repeats	early childhood to late adult	Yes	Worldwide
SCA19/22		1:112,318,443 - 112,532,146	1p13	KCND3	Potassium Voltage Gated Channel Shal Related Subfamily Member 3	Missense			adult	Yes	Worldwide	Channelopathy
SCA23		20:1,959,401 - 1,974,930	20p13	PDYN	Prodynorphin	Missense			adult	None reported	Dutch
SCA27		13:102,373,204 - 103,054,123	13q33	FGF14	Fibroblast Growth Factor 14	Missense			late childhood	None reported	Dutch
SCA28		18:12,328,942 - 12,377,274	18p11	AFG3L2	ATPase Family Gene 3-Like 2	Missense			young adult	None reported	Worldwide	Mitochondrial
SCA29		3:4,535,031 - 4,889,523	3p26	ITPR1	Inositol 1,4,5-Triphosphate receptor type 1	Missense			congenital	None reported	Australian, Canadian
SCA31		16:66,461,199 - 66,527,431	16q21	BEAN	Brain-Expressed, Associated with NEDD4	TGGAA repeat		2.5-3.8kb insertion	adult	None reported	Japanese
SCA35		20:2,361,553 - 2,413,398	20p13	TGM6	Transglutaminase 6	Missense			adult	None reported	Chinese
SCA36		20:2,633,177 - 2,639,038	20p13	NOP56	Nuclear Protein 56	GGCCTG repeat		>1500 repeats	adult	None reported	Japanese	RNA processing
DRPLA		12:7,033,625 - 7,051,483	12p13	ATN1	Atrophin 1	CAG repeat	≤ 35 repeats	>49 repeats	early childhood to late adult	Yes	Japanese, Portugese
EA1		12:5,019,072 - 5,027,421	12p13	KCNA1	Potassium Channel Voltage Gated Shaker Related Subfamily Member 1	Missense, Nonsense			childhood to early adult	None reported	Worldwide	Channelopathy
EA2		19:13,317,255 - 13,617,273	19p13	CACNA1A	Calcium Channel Voltage Dependent P/Q Type Alpha 1A Subunit	Deletion, Missense, Nonsense			early childhood to teens	None reported	Worldwide	Channelopathy
EA5		2:152,689,284 - 152,955,592	2q23	CACNB4β4	Calcium Channel Voltage Dependent Beta 4 Subunit	Missense			adult	None reported	French-Canadian	Channelopathy
EA6		5:36,606,456 - 36,688,435	5p13	SLC1A3	Solute Carrier Family 1 Member 3	Missense			early childhood	None reported	Dutch
CANPMR		1:6,845,383 - 7,829,765	1p36	CAMTA1	Calmodulin Binding Transcription Activator 1	Deletion, Duplication			congenital	None reported	French	Transcription
SNAX1	Hereditary Sensory Ataxia	8:42,704,779 - 42,751,865	8p11	RNF170	Ring Finger Protein 170	Missense			adult	None reported	Canadian	Ubiquitination
SPAX1	Hereditary Spastic Ataxia	12:6,571,402 - 6,579,842	12p13	VAMP1	Vesicle Associated Membrane Protein 1	Missense			late childhood to early adult	None reported	Canadian
Ataxia, deafness, and narcolepsy		19:10,244,020 - 10,305,782	19p13	DNMT1	DNA Methyltransferase 1	Missense			childhood to adult	None reported	Worldwide

## Sheet: Table S2
Table S2 - Recessive
Ataxia	Alias	Physical Location (Hg19)	Locus	Gene	Protein	Mutation Type	Age of Onset	Population	Pathway
SCAR			3q29	KIAA0226	Rubicon	Deletion	congenital	Saudi Arabian	Autophagy
SCAR1	AOA2	9:135,136,826 - 135,232,112	9q34	SETX	Senataxin	Deletion, Missense, Nonsense	early childhood to young adult	French-Canadian	DNA repair
SCAR5		15:85,291,817 - 85,349,662	15q25	ZNF592	Zinc Finger Protein 592	Missense	childhood	Lebanese
SCAR7		11:6,633,996 - 6,640,691	11p15	TPP1	Tripeptidyl Peptidase 1	Missense, Splice	childhood to young adult	Dutch
SCAR8	ARCA1	6:152,442,818 - 152,958,533	6q25	SYNE1	Synaptic Nuclear Envelope Protein 1	Nonsense, Splice	teens to adult	French-Canadian, Japanese, Brazilian
SCAR9	ARCA2, CoQ10 Deficiency	1:227,084,588 - 227,175,245	1q42	ADCK3	AARF Domain-Containing Kinase 3	Indel, Missense, Splice	early childhood	Algerian, American, French
SCAR10		3:43,407,817 - 43,663,559	3p22	ANO10	Anoctamin 10	Deletion, Missense, Nonsense, Splice	teens to adult	Dutch, French, Serbian	Channelopathy
SCAR11		1:210,111,518 - 210,337,635	1q32	SYT14	Synaptotagmin 14	Missense	late adult	Japanese
SCAR12		16:78,133,309 - 79,246,566	16q23	WWOX	WW Domain-Containing Oxidoreductase	Missense, Nonsense	early childhood	Egyptian, Middle East
SCAR13		6:146,286,031 - 146,758,781	6q24	GRM1	Glutamate Receptor Metabotropic 1	Deletion, Transversion	congenital	Bulgarian	Glutamate Receptor
SCAR14		11:66449966-66496715	11q13	SPTBN2	Spectrin Neta Nonerythrocytic 2	Deletion, Nonsense	early childhood	Pakistani, Egyptian
SCAN1		14:90,421,943 - 90,511,107	14q32	TDP1	Tyrosyl-DNA Phosphodiesterase 1	Missense	teens	Saudi Arabian	DNA repair
SPAX3		2:198,570,027 - 198,573,113	2q33	MARS2	Methionyl-tRNA Synthetase 2	Deletion, Duplication, Insertion	early childhood to adult	French-Canadian
SPAX4		10:30,598,729 - 30,638,266	10p11	MTPAP	Mitochondrial Poly(A) Polymerade	Missense	early childhood	Amish
SPAX5		18:12,328,942 - 12,377,274	18p11	AFG3L2	ATPase Family Gene 3-Like 2	Missense	early childhood	Colombian
AOA		4:93,225,452 - 94,695,706	4q22	GRID2	Glutamate Receptor Ionotropic Delta 2	Deletion	congenital	Turkish	Glutamate Receptor
AOA1		9:32,972,603 - 33,001,638	9q21	APTX	Aprataxin	Indel, Missense	childhood	Japanese, Portuguese	DNA repair
AOA3		17:8,782,232 - 8,869,028	17p13	PIK3R5	Phosphatidylinositol 3-Kinase, Regulatory Subunit 5	Missense	teens	Saudi Arabian
ARSACS		13:23,902,961 - 24,007,866	13q12	SACS	Sacsin	Indel, Missense	early childhood to young adult	Worldwide
Ataxia telangiectasia		11:108,093,558 - 108,239,828	11q22	ATM	Ataxia-Telangiectasia Mutated Gene	Indel, Missense, Nonsense, Splice	early childhood	Worldwide	DNA repair
AT like		11:94,150,465 - 94,227,039	11q21	MRE11A	Meiotic Recombination 11	Missense, Nonsense	early childhood	Italian, Pakistani, Saudi Arabian	DNA repair
Friedreich ataxia	FRDA	9:71,650,478 - 71,715,093	9q21	FXN	Frataxin	GAA repeat expansion, Indel, Missense, Nonsense, Splice	early childhood to young adult	Worldwide
CAMRQ1		9:2,621,678 - 2,654,484	9p24	VLDLR	Very Low Density Lipoprotein Receptor	Deletion, Missense, Nonsense	early childhood	Middle East
CAMRQ2		17:1,619,816 - 1,641,892	17p13	WDR81	WD Repeat-Containing Protein 81	Missense	early childhood	Turkish
CAMRQ3		8:61,101,422 - 61,193,953	8q12	CA8	Carbonic Anhydrase VIII	Missense	congenital	Middle East
CAMRQ4		13:25,946,208 - 26,599,988	13q12	ATP8A2	ATPase, Class I, Type 8A, Member 2	Missense	early childhood	Turkish
MIRAS	SANDO, SCAE	15:89,859,535 - 89,878,025	15q26	POLG	Polymerase DNA Gamma	Missense	early childhood to adult	European	Mitochondrial
Refsum disease		10:13,319,795 - 13,342,132	10p13	PHYH	Phytanoyl-CoA Hydroxylase	Indel, Missense, Splice	early childhood to adult	Pakistani, Ukranian
Cayman Ataxia		19:3,880,617 - 3,928,079	19p13	ATCAY	Caytaxin	Missense, Splice	early childhood	Cayman Islands
Neurodegeneration with Optic Atrophy		4:41,258,897 - 41,270,445	4p13	UCHL1	Ubiquitin Carboxyl Terminal Esterase L1	Missense	childhood	Turkish
Cerebellar ataxia and hypogonadotropic hypogonadism		7:5,659,671 - 5,821,360	7p22	RNF216	Ring Finger Protein 216	Deletion, Missense, Nonsense	teens to young adult	Palestinian, caucasian, Asian	Ubiquitination
Gordon Holmes syndrome		16:730,114 - 732,767	16p13	CHIP	C Terminus of HSC70-Interacting Protein	Missense	teens		Ubiquitination
IOSCA		10:102,747,292 - 102,754,158	10q24	C10orf2	Chromosome 10 open reading frame 2	Missense, Nonsense	early childhood	European, Middle East	Mitochondrial
Ataxia with isolated vitamin E deficiency	AVED	8:63,972,046 - 63,998,611	8q12	TTPA	Tocopherol Transfer Protein, Alpha	Indel, Missense, Nonsense	early childhood to young adult	Worldwide
SESAME		1:160,007,256 - 160,040,050	1q23	KCNJ10	Potassium Channel, Inwardly Rectifying, Subfamily J, Member 10	Deletion, Missense, Nonsense	early childhood	Worldwide
